# Supplementary material
Source: HighWire-hosted journal article supplement (https://jmg.bmj.com/content/56/5/283)
Supplement: inline-supplementary-material-7 [file inline-supplementary-material-7.xlsx]

## Sheet: Table S6
EntrezGene ID	Human gene	Stage 3
		Primary auditory cortex			Amygdala			Dorsolateral prefrontal cortex			Hippocampus			Posteroventral (inferior) parietal cortex			Inferolateral temporal cortex			Primary motor cortex			Mediodorsal nucleus of thalamus			Anterior (rostral) cingulate (medial prefrontal) cortex			Orbital frontal cortex			Primary somatosensory cortex			Posterior (caudal) superior temporal cortex			Striatum			Primary visual cortex			Ventrolateral prefrontal cortex
		logFC	Pvalue	adjPVal	logFC	Pvalue	adjPVal	logFC	Pvalue	adjPVal	logFC	Pvalue	adjPVal	logFC	Pvalue	adjPVal	logFC	Pvalue	adjPVal	logFC	Pvalue	adjPVal	logFC	Pvalue	adjPVal	logFC	Pvalue	adjPVal	logFC	Pvalue	adjPVal	logFC	Pvalue	adjPVal	logFC	Pvalue	adjPVal	logFC	Pvalue	adjPVal	logFC	Pvalue	adjPVal	logFC	Pvalue	adjPVal
56997	ADCK3	1.11489	0.25959	0.626297	2.48611	0.0122585	0.231182	1.69595	0.0556282	0.244614	3.03365	0.000665212	0.0172065	1.94279	0.0284762	0.127198	1.78456	0.0440771	0.221085	1.62006	0.101741	0.454793	3.79791	0.000142968	0.00253309	1.79955	0.0423396	0.225209	2.22461	0.024882	0.158967	1.63784	0.0980548	0.388734	0.645996	0.464951	0.747979	2.94782	0.000936985	0.0177912	2.14756	0.0155347	0.0871966	1.92802	0.0296958	0.200767
10939	AFG3L2	3.00445	0.294267	0.663015	2.19067	0.44426	1	0.0940133	0.970707	1	-0.94515	0.71202	1	0.102426	0.968087	1	1.02043	0.690232	0.948728	-0.0359327	0.989984	1	1.2424	0.664293	0.891755	-0.503606	0.844058	0.995639	-0.436951	0.878671	1	0.902542	0.752537	0.980872	1.67697	0.512579	0.783043	-1.13881	0.656493	0.981699	1.26515	0.621245	0.864577	0.64913	0.799849	1
55129	ANO10	1.00962	0.320242	0.689177	0.352495	0.728402	1	0.816089	0.368979	0.725128	-1.58226	0.0820397	0.502553	0.917617	0.312498	0.604807	0.978575	0.28149	0.671589	0.37459	0.712117	0.990836	-5.34147	2.47868e-07	1.2325e-05	0.673569	0.458308	0.845557	0.0838442	0.934166	1	0.867473	0.393003	0.809101	1.01014	0.266286	0.544782	0.298908	0.741989	0.999536	0.256082	0.777899	0.944161	0.154815	0.864597	1
54840	APTX	1.50374	0.153837	0.474611	1.08546	0.302932	1	1.15104	0.222103	0.558089	0.672789	0.47512	0.986468	1.45325	0.123434	0.34446	1.65254	0.0799667	0.323402	1.58046	0.133967	0.530611	2.20093	0.0371832	0.160754	1.26061	0.181257	0.540417	1.48638	0.158629	0.5053	1.49675	0.155754	0.509347	1.59304	0.0913896	0.280055	1.93134	0.0408963	0.27452	1.41612	0.133279	0.375583	1.48009	0.116678	0.468557
472	ATM	2.4947	6.50592e-06	0.000225592	1.02734	0.0600698	0.610956	2.27017	4.53182e-06	0.000138575	1.83716	0.000191119	0.00636663	2.58055	2.11061e-07	8.15204e-06	1.91726	0.00010041	0.00200065	2.11489	0.000123682	0.0037316	2.70633	1.06572e-06	4.29252e-05	2.17704	1.06933e-05	0.000345362	2.47734	7.50739e-06	0.000266867	2.13946	0.000103462	0.00231547	2.46073	7.15528e-07	2.23435e-05	1.7208	0.000467803	0.0101045	2.28124	4.08431e-06	0.000109578	1.91142	0.000105312	0.0026612
1822	ATN1	-25.5669	0.199864	0.549253	-28.3917	0.154685	0.944146	-26.19	0.142206	0.433365	-7.83231	0.660269	1	-15.0695	0.397911	0.691506	-31.2152	0.0804532	0.324646	-17.3651	0.383608	0.854433	-7.69891	0.69916	0.90765	-20.8369	0.242672	0.632065	-13.1573	0.509058	0.871017	-30.168	0.130554	0.462626	-32.8439	0.0659405	0.22569	-23.9777	0.178947	0.624071	-28.3617	0.112086	0.337392	-27.296	0.126166	0.484721
492	ATP2B3	-1.64478	0.668225	0.93359	-0.683041	0.858721	1	-1.31803	0.700984	0.937149	-1.65968	0.628742	1	-1.73281	0.613705	0.85321	-2.63544	0.442752	0.823801	-1.79369	0.64023	0.978185	0.0947255	0.980305	1	-2.19658	0.522286	0.888699	-1.45766	0.704064	0.966241	-2.90679	0.448921	0.855462	-1.86889	0.586153	0.834143	-2.54793	0.458033	0.90855	-1.26746	0.711931	0.911608	-1.86051	0.587833	0.94717
51761	ATP8A2	0.049642	0.991387	1	0.687312	0.881187	1	-5.73622	0.163718	0.472277	-0.9672	0.814092	1	-2.9941	0.466808	0.751035	-5.57383	0.175942	0.524644	-6.78998	0.140422	0.544105	-3.55516	0.439649	0.743056	-4.69727	0.253883	0.644592	-5.91607	0.198801	0.569307	-6.79378	0.140201	0.482397	0.137245	0.97338	1	4.42165	0.28276	0.773198	1.29683	0.752549	0.931222	-6.0628	0.141097	0.51307
6310	ATXN1	-1.86882	0.305032	0.672785	-1.3571	0.4562	1	-2.8609	0.0796158	0.308846	-0.831058	0.609868	1	-2.83722	0.0821277	0.263144	-2.42569	0.13696	0.450757	-2.70428	0.138079	0.538717	-0.735703	0.686172	0.901196	-2.0558	0.207308	0.581298	-2.30396	0.206224	0.577783	-4.30814	0.0184404	0.130227	-1.8072	0.267511	0.546233	-6.23103	0.000153048	0.00388484	-5.06305	0.00201922	0.0188614	-2.33422	0.152344	0.535487
25814	ATXN10	-1.68551	0.866157	0.993594	-3.52508	0.72449	1	-2.71272	0.761691	0.958515	-5.00411	0.575938	1	-4.53637	0.612107	0.85183	-4.06407	0.649619	0.934181	-7.13606	0.475652	0.908647	-16.0744	0.10864	0.326327	-1.39198	0.876333	1	-12.1481	0.22496	0.606632	-4.84854	0.627851	0.943944	-3.37422	0.706027	0.90357	6.63843	0.458164	0.90855	-1.40744	0.87497	0.979144	-4.19383	0.639218	0.965088
6311	ATXN2	0.003586	0.996683	1	-1.44734	0.094071	0.766226	-0.512275	0.506875	0.832889	-0.0589713	0.939078	1	0.173103	0.822493	0.963039	-1.71055	0.0271785	0.159295	-0.599296	0.487391	0.915094	0.160982	0.851969	0.969259	-0.58308	0.450024	0.840005	-0.954228	0.269093	0.666643	-1.42913	0.0982663	0.389209	-0.112846	0.883724	0.976125	-0.000420333	0.999565	1	-0.194082	0.801408	0.954663	-1.054	0.172522	0.567465
4287	ATXN3	0.583345	0.171804	0.503999	0.0287697	0.946197	1	0.587878	0.1238	0.401913	0.520024	0.173231	0.711268	0.592687	0.120767	0.339871	0.554235	0.146718	0.469387	0.659297	0.122649	0.505624	0.325415	0.445477	0.748346	0.434851	0.254575	0.644774	0.724689	0.0898393	0.358161	0.645239	0.130802	0.463313	0.666728	0.0810603	0.259332	0.416805	0.274785	0.764259	0.480454	0.208204	0.489166	0.651696	0.0881188	0.398332
6314	ATXN7	1.15001	0.020559	0.133973	0.530294	0.284041	1	1.06568	0.0164505	0.105418	0.789887	0.0748496	0.477842	1.18634	0.00763803	0.0488627	0.463716	0.294916	0.687633	0.965706	0.0515252	0.310074	1.322	0.00783794	0.0533093	0.946495	0.0329738	0.190625	1.21167	0.0147243	0.110913	0.769422	0.120444	0.44109	1.04375	0.0187826	0.0931541	0.813186	0.0667025	0.369852	1.18429	0.00774227	0.0522188	0.749867	0.0907375	0.405414
56652	ATXN80S	-2.35506	0.17542	0.50947	-1.33854	0.440801	1	-1.9081	0.219555	0.553819	2.37304	0.127024	0.615905	-3.53338	0.0233688	0.11072	-6.62604	2.5283e-05	0.000618613	-2.78793	0.108896	0.470669	2.56614	0.139925	0.383601	-2.44079	0.116567	0.425329	-3.17754	0.067822	0.30247	-5.25216	0.00264902	0.0308283	-3.36777	0.0306314	0.133897	2.49145	0.109199	0.487386	-2.32962	0.134104	0.376718	-2.54137	0.102307	0.434888
146227	BEAN1	2.2451	0.0801832	0.323865	3.08686	0.0163588	0.279973	1.62484	0.156536	0.460244	0.533408	0.641406	1	1.36986	0.23209	0.512544	-0.789322	0.490793	0.851975	0.678628	0.596147	0.964897	0.0627648	0.9609	0.997966	-1.65714	0.148488	0.487277	-0.480237	0.707614	0.966524	0.588229	0.645961	0.950926	0.72765	0.525269	0.791038	4.96061	1.92332e-05	0.000648348	3.79785	0.00100169	0.0108458	-0.233561	0.838388	1
56652	C10orf2	1.61178	0.0528008	0.251981	0.644798	0.437436	1	0.75357	0.310429	0.665704	1.28156	0.0849723	0.510136	1.68512	0.023737	0.111988	1.53965	0.0386938	0.202876	0.887429	0.285383	0.76517	2.94513	0.00043805	0.00607751	0.678982	0.360688	0.76553	1.25972	0.129726	0.449638	1.04369	0.209114	0.598032	1.17585	0.113877	0.323706	0.0804813	0.91367	1	-0.022155	0.976192	1	0.698602	0.346995	0.78972
773	CACNA1A	9.17465	0.083261	0.330821	10.7445	0.0426848	0.505176	4.39279	0.353064	0.71133	9.03097	0.0567415	0.406639	6.08955	0.198229	0.465729	3.52657	0.455844	0.833707	4.32919	0.412951	0.875456	6.72216	0.203953	0.481915	3.71085	0.432665	0.827866	5.32243	0.314275	0.715589	1.38259	0.793642	0.990067	7.39365	0.118466	0.332458	11.0869	0.0194973	0.174641	9.19041	0.0525316	0.205736	6.02249	0.203202	0.620364
440193	CCDC88C	2.6926	0.116714	0.404375	1.13245	0.508769	1	2.5248	0.100118	0.35448	1.16558	0.447088	0.974398	2.32652	0.129618	0.356026	2.5526	0.0964505	0.366312	2.93668	0.0872048	0.418169	2.08216	0.224764	0.510721	1.85821	0.225792	0.609833	1.98389	0.247363	0.638594	3.5892	0.0367855	0.210437	2.92379	0.0570625	0.204713	-21.0142	2.18985e-34	1.19778e-31	1.96744	0.199737	0.47715	1.90269	0.214901	0.640961
5611	DNAJC3	2.49749	0.165335	0.493385	-0.288052	0.872694	1	1.55506	0.333794	0.691713	-0.291456	0.856158	1	1.71654	0.286104	0.575877	1.58046	0.325968	0.719395	0.879981	0.624532	0.972323	1.88946	0.293614	0.598236	1.19466	0.457654	0.845557	1.61262	0.36996	0.769699	1.18703	0.509179	0.890788	2.64076	0.10118	0.299278	0.458784	0.775396	1	2.16328	0.17906	0.44827	0.695149	0.665532	0.975407
1786	DNMT1	5.86222	0.0456436	0.229642	2.63999	0.366949	1	2.25008	0.389921	0.744119	4.18147	0.110574	0.58028	4.81501	0.0663206	0.228331	1.28519	0.623246	0.923204	2.28363	0.435075	0.887634	8.28692	0.00484579	0.0378283	1.36903	0.600772	0.92555	2.82609	0.334186	0.734354	1.21173	0.678656	0.960721	4.7277	0.0713703	0.237658	-0.277874	0.915397	1	3.15564	0.228148	0.516877	1.45609	0.577831	0.944558
1938	EEF2	-407.279	0.0454115	0.229166	-134.17	0.508694	1	-373.489	0.0402588	0.197177	-92.7456	0.609478	1	-232.804	0.200223	0.469047	-165.1	0.363377	0.757582	-289.674	0.154115	0.567961	82.8269	0.683232	0.900439	-263.235	0.147656	0.486812	-160.901	0.428111	0.817674	-256.169	0.207411	0.595169	-359.407	0.0483586	0.183174	-326.154	0.0730606	0.388709	-613.502	0.000803336	0.00913572	-268.897	0.139166	0.5096
6785	ELOVL4	2.78342	0.677365	0.938196	5.9555	0.373567	1	2.14189	0.720367	0.94328	0.838515	0.888541	1	0.363018	0.951617	0.999249	2.25056	0.706823	0.952486	-1.3943	0.834887	1	-13.2616	0.0480577	0.19214	1.8027	0.763194	0.980528	-2.67969	0.688745	0.960233	0.156484	0.981336	1	2.02452	0.735095	0.917228	1.00883	0.866098	1	3.18704	0.594324	0.847971	2.62967	0.660321	0.973363
60481	ELOVL5	2.56981	0.727047	0.955159	-3.73136	0.61231	1	0.528506	0.936025	0.998136	-7.55753	0.251509	0.835703	1.83556	0.780428	0.944671	2.01123	0.760034	0.967239	-3.20026	0.663803	0.983496	-0.413746	0.955179	0.996933	-1.21468	0.853641	0.997527	-5.27206	0.474056	0.851584	-0.164711	0.982149	1	3.88853	0.554908	0.813507	-1.39427	0.832303	1	4.73715	0.472028	0.763353	-0.687335	0.916861	1
2259	FGF14	1.03569	0.737663	0.958746	2.25806	0.465361	1	-5.22469	0.0595178	0.255579	2.08117	0.451896	0.975663	-2.48991	0.368206	0.663037	-5.24956	0.0583216	0.264837	-7.73413	0.0127732	0.124473	0.890125	0.773439	0.940367	-3.00813	0.277115	0.674408	-7.83569	0.0116548	0.0944534	-9.46485	0.00236287	0.0283545	1.59726	0.563639	0.818592	-1.05771	0.702136	0.992036	2.08343	0.451405	0.746806	-3.33241	0.228688	0.657649
2332	FMR1	3.8304	0.207701	0.559189	-1.54431	0.611129	1	3.4485	0.204739	0.53212	1.83969	0.498337	0.991246	3.68687	0.175228	0.432187	2.38267	0.380619	0.77336	2.38058	0.433278	0.886529	4.57413	0.132634	0.371113	3.11052	0.252571	0.642816	2.113	0.486688	0.85747	2.03853	0.502164	0.887789	3.30946	0.223548	0.491159	0.87671	0.746875	1	3.24726	0.232353	0.522102	2.81487	0.300407	0.7467
2395	FXN	1.43552	2.58998e-06	0.000105062	1.13741	0.000178872	0.00806637	1.21349	8.56803e-06	0.000238509	0.152724	0.569846	1	1.412	2.57063e-07	9.56785e-06	1.302	1.89064e-06	6.42437e-05	0.918914	0.00238035	0.0361953	0.0727227	0.80872	0.955186	1.11131	4.40317e-05	0.0011261	0.884963	0.00341878	0.0382381	1.18671	9.38306e-05	0.00214131	1.31837	1.4164e-06	4.0458e-05	0.965196	0.00037263	0.00832453	1.37124	5.46575e-07	1.84249e-05	0.885399	0.00107804	0.0171314
57704	GBA2	0.0751153	0.988878	1	0.609417	0.909957	1	-3.23381	0.502389	0.830253	2.12488	0.65935	1	1.17027	0.80816	0.957159	-6.53583	0.175663	0.524206	0.929255	0.863088	1	-6.28401	0.244019	0.535887	-1.52951	0.750998	0.977428	1.08607	0.840274	0.995257	-1.83794	0.733065	0.975415	-2.80103	0.561228	0.81705	3.8782	0.42124	0.885882	-0.38219	0.936796	0.995146	-4.14708	0.389803	0.82515
9570	GOSR2	2.59102	0.109048	0.38788	-0.293813	0.855538	1	0.719027	0.618452	0.897789	1.00287	0.48735	0.991246	2.90407	0.0448632	0.175519	1.81896	0.208143	0.577528	1.0883	0.50022	0.921699	1.91431	0.236027	0.525398	1.53166	0.289035	0.688906	0.77583	0.630756	0.938496	1.07425	0.505767	0.889604	3.06554	0.0342807	0.144845	1.97127	0.172629	0.612107	2.58984	0.0734581	0.257027	0.625765	0.664677	0.97514
2895	GRID2	28.0031	1.3551e-31	1.14885e-28	26.3249	1.1235e-28	9.07147e-26	27.6469	8.85336e-37	7.14845e-34	27.0742	1.262e-35	1.33741e-32	26.8348	3.81504e-35	2.39585e-32	26.5797	1.23659e-34	8.38706e-32	26.4863	5.92476e-29	4.01841e-26	26.1078	2.65041e-28	1.79761e-25	25.7139	6.54208e-33	4.4371e-30	26.1366	2.36586e-28	1.48576e-25	27.1547	4.12374e-30	2.79689e-27	27.9464	2.19502e-37	1.77232e-34	25.4659	2.02381e-32	1.00928e-29	28.2322	5.78235e-38	4.90228e-35	26.9474	2.2683e-35	1.83149e-32
2911	GRM1	0.492116	0.860433	0.991681	1.10095	0.69409	1	1.34555	0.591005	0.880896	1.60554	0.521421	0.993307	1.09499	0.661861	0.885685	-0.663444	0.791005	0.977326	1.17462	0.674762	0.985156	1.14939	0.681356	0.899842	0.698205	0.78033	0.985417	0.632735	0.821155	0.991452	0.63754	0.81982	0.995835	0.218654	0.930399	0.988104	1.47567	0.555648	0.951385	2.65198	0.289836	0.59296	1.27115	0.611679	0.95674
3708	ITPR1	25.7995	0.00871625	0.073201	27.4653	0.00526303	0.122582	25.4999	0.00378784	0.0362249	27.6542	0.00170966	0.0369758	24.5458	0.00529948	0.0370395	25.365	0.00397454	0.0383864	25.4866	0.00955588	0.102736	28.2654	0.00409447	0.0332659	24.3735	0.00562485	0.0550664	24.998	0.0110128	0.0908676	24.6101	0.0123072	0.0975602	26.3983	0.00273545	0.0223422	25.8305	0.00336378	0.049382	26.0492	0.00310768	0.0267753	25.9581	0.00321212	0.0408538
3748	KCNC3	2.81921	0.549333	0.86582	4.95064	0.29332	1	3.18447	0.449621	0.792493	1.21653	0.772636	1	2.51105	0.551	0.814403	2.06064	0.624593	0.923657	2.8898	0.539384	0.940969	-0.722317	0.878045	0.977024	0.534487	0.898981	1	1.47564	0.753927	0.979107	0.695071	0.882611	1	1.92873	0.646927	0.870098	4.49	0.286624	0.775495	3.0366	0.470929	0.762516	3.0143	0.474191	0.88519
3752	KCND3	12.9771	0.000510768	0.00829808	9.80531	0.0083962	0.173617	12.8095	0.000129356	0.00232841	9.11005	0.00620475	0.0966982	12.8592	0.000121916	0.00182455	11.7853	0.000419607	0.00647971	11.5774	0.00189744	0.0306118	7.77722	0.0362136	0.158212	12.0177	0.000323518	0.00571414	12.6602	0.000694823	0.0109768	12.1661	0.00110886	0.0155259	12.7672	0.000136006	0.00195268	10.0791	0.00249324	0.0392164	13.5353	5.35505e-05	0.000974252	11.8315	0.000398573	0.00774288
3766	KCNJ10	3.751	0.813923	0.981292	-3.75403	0.813776	1	3.38445	0.81232	0.971297	-3.0321	0.831548	1	3.89464	0.784683	0.947166	3.43967	0.809317	0.979547	2.15749	0.89231	1	-0.972528	0.951338	0.996472	2.55267	0.857872	0.998068	3.17782	0.841947	0.995257	3.33035	0.834468	0.99947	3.7861	0.790541	0.94373	-0.322357	0.981957	1	3.52602	0.804626	0.955328	1.87823	0.895167	1
9711	KIAA0226	-3.61494	0.148771	0.465543	-2.98309	0.233223	1	-5.74843	0.0105097	0.0762509	-6.21839	0.00568339	0.0913436	-4.83643	0.0311074	0.135412	-7.23323	0.00132507	0.0163761	-4.79662	0.0556661	0.323577	-2.23339	0.371904	0.679453	-7.59668	0.00075387	0.0113522	-4.96581	0.0476189	0.242877	-7.07668	0.00488705	0.0489745	-3.18712	0.154642	0.39318	-4.92001	0.0283297	0.222386	-1.86283	0.404995	0.70533	-7.2769	0.00123971	0.0192496
10749	KIF1C	0.597343	0.961036	1	-0.00504167	0.999671	1	0.455436	0.966782	1	-1.05266	0.923319	1	1.27196	0.90741	0.988185	0.419022	0.969437	1	1.15229	0.924919	1	-0.0780227	0.994909	1	0.710587	0.948194	1	1.58288	0.896998	1	0.934401	0.939085	1	0.496187	0.963812	0.998741	0.161756	0.988199	1	0.628914	0.954141	0.997633	0.452596	0.966989	1
92935	MARS2	0.803422	0.183973	0.524276	0.449607	0.456765	1	0.588483	0.276369	0.625733	0.351762	0.515035	0.991507	0.621725	0.250192	0.534963	0.560848	0.299513	0.692278	0.0840685	0.889289	1	0.716341	0.236044	0.525398	0.555042	0.304536	0.70488	-0.058049	0.923425	1	-0.05421	0.928475	1	0.808738	0.134978	0.360907	0.0724907	0.893244	1	0.735957	0.173633	0.441067	0.165397	0.759467	1
4361	MRE11A	1.50445	0.000631356	0.00970559	0.236298	0.588255	1	1.37456	0.00048304	0.00695874	0.233864	0.54917	0.997989	1.6293	3.75619e-05	0.000677552	1.28336	0.00110565	0.0141596	1.42683	0.00117771	0.0212244	1.788	5.17099e-05	0.00111268	1.37955	0.00046104	0.00763791	1.51969	0.000556845	0.0091847	1.579	0.000338316	0.0061554	1.63332	3.59761e-05	0.000640768	0.688485	0.0784295	0.405566	1.61063	4.58385e-05	0.000857879	1.17307	0.00282986	0.03711
4547	MTPAP	-	-	-	-	-	-	-	-	-	-	-	-	-	-	-	-	-	-	-	-	-	-	-	-	-	-	-	-	-	-	-	-	-	-	-	-	-	-	-	-	-	-	-	-	-
10528	NOP56	-1.61029	0.570982	0.879183	-0.308041	0.913667	1	-2.99014	0.239836	0.584528	-0.65595	0.796331	1	-1.50835	0.552934	0.815832	-0.997476	0.694722	0.949739	0.363344	0.898246	1	2.83843	0.318158	0.623979	-2.85344	0.261963	0.654947	-0.785095	0.782319	0.982416	0.281011	0.921217	1	-0.942466	0.710775	0.905817	-4.34258	0.0881756	0.435379	-1.5035	0.55421	0.818856	-1.28759	0.612464	0.957094
5111	PCNA	35.338	1.47315e-05	0.000447648	14.6851	0.0685648	0.655813	32.3184	9.53719e-06	0.000259155	17.9932	0.0127873	0.162535	35.331	1.38766e-06	4.15709e-05	37.088	4.23363e-07	1.76377e-05	30.8182	0.000150093	0.00426294	33.4649	3.97721e-05	0.000890179	31.0273	2.08797e-05	0.000612518	31.4318	0.000111192	0.00262221	37.4045	4.68236e-06	0.000170374	34.6133	2.224e-06	5.98573e-05	7.89703	0.27276	0.76176	31.3328	1.73863e-05	0.000383358	31.707	1.38665e-05	0.000513365
5173	PDYN	0.27418	0.992301	1	-1.68821	0.95262	1	-0.629248	0.980246	1	-4.2828	0.866172	1	-0.067908	0.997868	1	0.0180717	0.999433	1	-0.928003	0.973945	1	-0.887821	0.975072	1	-0.233779	0.99266	1	-0.732045	0.979445	1	0.121388	0.996591	1	-0.0595407	0.998131	1	-107.693	2.87702e-05	0.000930968	-0.721993	0.977335	1	0.009809	0.999692	1
23533	PIK3R5	-	-	-	-	-	-	-	-	-	-	-	-	-	-	-	-	-	-	-	-	-	-	-	-	-	-	-	-	-	-	-	-	-	-	-	-	-	-	-	-	-	-	-	-	-
11284	PNKP	0.0267725	0.988593	1	0.161198	0.931401	1	-1.37185	0.412979	0.76294	-0.628746	0.707396	1	-1.10153	0.510885	0.785649	-0.400359	0.811085	0.980484	0.123683	0.947339	1	-1.3828	0.460426	0.759138	-1.22241	0.46566	0.850466	0.515788	0.782989	0.982812	-0.345988	0.853417	1	-2.43215	0.147095	0.381075	-3.15303	0.0604322	0.349127	-2.30841	0.168723	0.433465	-0.995955	0.552189	0.932451
5428	POLG	2.36453	0.148241	0.464532	-0.436803	0.789101	1	0.868784	0.552061	0.86073	1.14677	0.432572	0.969212	2.34067	0.109697	0.318899	1.20137	0.411002	0.798493	1.15922	0.477934	0.909668	2.93187	0.0732641	0.251675	0.0216293	0.988185	1	1.82381	0.264486	0.661645	0.852562	0.601676	0.933778	1.64509	0.260467	0.538594	-0.272527	0.851985	1	0.184809	0.899311	0.986879	0.558924	0.701989	0.988041
11128	POLR3A	-0.890669	0.604466	0.901595	-1.5932	0.354364	1	-1.43746	0.350179	0.70821	0.677937	0.659335	1	-1.32743	0.388237	0.683083	-2.45533	0.110977	0.398417	-1.7795	0.300998	0.78093	2.2109	0.198971	0.474374	-1.43277	0.351751	0.757043	-1.28174	0.456111	0.837343	-2.45893	0.153241	0.50473	0.454929	0.767351	0.930057	-0.0575763	0.970131	1	-0.590464	0.701005	0.906447	-1.38816	0.36693	0.807274
5521	PPP2R2B	-16.0112	0.0076711	0.0667716	-11.2711	0.0598556	0.609922	-17.2212	0.00138016	0.0162914	-12.6395	0.0184773	0.207622	-14.4472	0.00715623	0.0464342	-15.6743	0.00355461	0.0351734	-16.7833	0.00521641	0.0652921	-12.9653	0.030549	0.140529	-19.5249	0.000295782	0.00530717	-20.5076	0.000664942	0.0105866	-16.9834	0.00470938	0.0475309	-17.379	0.00124815	0.0120384	-7.39901	0.166714	0.601831	-13.7983	0.0101729	0.0641951	-14.5798	0.00664931	0.0698273
144165	PRICKLE1	3.18024	0.301144	0.668728	2.88458	0.348251	1	2.05115	0.455738	0.797856	3.95854	0.150467	0.667186	1.28561	0.640057	0.871291	1.12849	0.681451	0.945385	0.946657	0.758077	0.997308	-5.75087	0.0619809	0.226301	0.622055	0.820976	0.99142	-0.177174	0.954028	1	-1.38381	0.652563	0.953069	2.99913	0.275669	0.555929	4.65194	0.0912635	0.443954	2.99276	0.276689	0.578225	1.95047	0.478139	0.88779
5582	PRKCG	1.11496	0.956815	1	0.209031	0.9919	1	1.08146	0.953173	1	-16.2058	0.379147	0.94403	-0.0484383	0.997901	1	-0.180579	0.992177	1	-0.648849	0.974861	1	-4.6395	0.821731	0.959939	-0.286701	0.987579	1	0.071668	0.997223	1	-1.174	0.954531	1	-0.349168	0.984873	1	-12.2143	0.50732	0.933593	-0.587787	0.974539	1	-2.45525	0.893942	1
26278	SACS	3.67557	0.194857	0.541377	-2.6794	0.344378	1	1.04441	0.680124	0.927845	2.60305	0.304461	0.892275	2.05835	0.416641	0.709222	-0.644	0.799305	0.977637	-0.964292	0.733487	0.992974	3.30122	0.244185	0.536113	1.13613	0.653799	0.948645	1.40059	0.620953	0.936066	-0.33524	0.905765	1	3.33646	0.188312	0.443475	-0.6587	0.794826	1	2.78971	0.271148	0.572182	0.466702	0.853814	1
950	SCARB2	49.574	9.20563e-05	0.00202715	20.0275	0.110738	0.828998	43.0581	0.000144721	0.00254817	42.4042	0.00018152	0.00608272	48.9659	1.6467e-05	0.000341756	44.9522	7.38986e-05	0.00154694	33.2705	0.00827084	0.0917019	50.094	7.79163e-05	0.00153622	40.4081	0.000356196	0.00616922	33.8416	0.00723854	0.0670692	39.572	0.00172236	0.0220576	52.6993	3.71505e-06	9.30463e-05	44.6687	8.18436e-05	0.00230139	52.338	4.30734e-06	0.000114118	40.3445	0.00036377	0.00719731
23064	SETX	2.99712	0.0768322	0.315364	0.348291	0.836724	1	2.08129	0.169134	0.481181	1.39556	0.356175	0.93134	2.26953	0.133884	0.362527	0.681049	0.652355	0.934819	1.55142	0.35891	0.834112	4.56057	0.00726942	0.0504958	1.1475	0.447957	0.839008	1.91894	0.256625	0.650497	0.952545	0.573086	0.921416	3.11961	0.0396497	0.159919	2.11639	0.162079	0.593696	2.75073	0.0694679	0.247302	1.28705	0.394761	0.829027
64374	SIL1	0.548112	0.530746	0.855684	0.105761	0.903698	1	0.538077	0.491462	0.823721	-1.89186	0.0159786	0.188018	0.628527	0.421667	0.713806	0.707662	0.365684	0.758949	0.51147	0.55856	0.949087	-0.833927	0.340395	0.647781	0.387177	0.620509	0.935464	0.934796	0.285286	0.68484	0.73617	0.399928	0.814439	0.408225	0.601646	0.843797	-0.463569	0.553332	0.95094	0.401741	0.60743	0.855969	0.247177	0.751905	0.999802
6548	SLC9A1	-0.111441	0.961428	1	-0.582775	0.800351	1	-0.236564	0.908622	0.995836	-0.558589	0.786386	1	0.079649	0.969174	1	-0.431575	0.834145	0.986152	-0.377995	0.869704	1	-1.95039	0.397577	0.703362	-0.24188	0.906577	1	-0.0532868	0.981551	1	-0.691447	0.764143	0.985121	-0.430822	0.834429	0.96143	-1.43678	0.48589	0.924352	-0.469837	0.819684	0.961239	-0.37601	0.855244	1
6687	SPG7	4.83362	0.0620761	0.278231	2.33181	0.36714	1	2.04846	0.375732	0.731676	3.11684	0.178061	0.72049	5.14878	0.0264455	0.121126	3.39623	0.142348	0.461035	3.63907	0.159656	0.578324	4.4952	0.0826125	0.273376	2.18553	0.344668	0.7502	5.26539	0.0422101	0.224954	3.9235	0.129576	0.460315	3.08402	0.182661	0.434722	0.954481	0.679664	0.988256	2.24959	0.33073	0.637257	1.67642	0.46842	0.881482
6712	SPTBN2	-9.98058	0.451355	0.805173	0.301565	0.981837	1	-11.9832	0.31217	0.667737	0.71193	0.952084	1	-13.2988	0.262101	0.549275	-9.36572	0.429441	0.812952	-4.66028	0.724995	0.991857	4.96647	0.707735	0.912109	-13.7247	0.247157	0.636896	-2.86249	0.828915	0.993162	-9.86106	0.456788	0.859906	-12.5908	0.288308	0.572966	2.15802	0.855471	1	-17.0571	0.150574	0.404809	-11.5665	0.329272	0.775327
10273	STUB1	-13.3984	0.679154	0.939063	-0.448323	0.988956	1	-24.8004	0.392209	0.745884	-9.93854	0.731571	1	-21.1447	0.465632	0.7505	-0.695639	0.980843	1	-13.0897	0.686147	0.987548	-35.5423	0.272913	0.571915	-18.1852	0.5303	0.891864	-6.09856	0.850653	0.99675	-12.563	0.698139	0.965999	-27.5675	0.341624	0.629559	-17.3389	0.5496	0.950817	-28.5121	0.325361	0.63201	-17.8182	0.538626	0.923545
23345	SYNE1	-0.948014	0.632064	0.916712	0.310011	0.875557	1	-0.385596	0.827605	0.975646	0.82177	0.642607	1	-0.592804	0.737788	0.924013	-0.802146	0.650565	0.934656	0.0514115	0.97928	1	1.68077	0.396095	0.701879	-0.0807017	0.963645	1	0.350599	0.859424	0.999068	-1.39453	0.481302	0.876498	-0.834218	0.637581	0.864727	1.29953	0.463146	0.911383	-0.341273	0.84716	0.97053	-0.135774	0.938875	1
255928	SYT14	0.424509	0.496691	0.833603	-0.311724	0.61764	1	0.468526	0.401704	0.753295	0.214906	0.700383	1	0.29432	0.598229	0.84333	-0.0344843	0.95076	1	-0.0652707	0.916738	1	0.991118	0.113072	0.33583	0.235984	0.672634	0.953934	0.518998	0.406054	0.799325	-0.148969	0.811421	0.993349	0.542278	0.33184	0.620156	0.512122	0.359395	0.843563	0.527803	0.34489	0.651729	0.34041	0.542242	0.926094
6908	TBP	-1.3907	0.190527	0.53398	-2.33431	0.0283666	0.393548	-2.35925	0.0133348	0.0900506	-0.12741	0.893204	1	0.0662217	0.944371	0.998802	-2.36327	0.0131797	0.0942134	-2.28735	0.0316833	0.224591	0.988129	0.352022	0.661101	-1.75613	0.0649239	0.297879	-3.51264	0.00102284	0.0149382	-2.65593	0.012716	0.0994979	-2.10928	0.0267942	0.121217	-0.767748	0.418753	0.884305	-0.519667	0.584068	0.841652	-1.99213	0.0364096	0.229162
55775	TDP1	0.823491	0.0749388	0.311284	-0.0731718	0.873979	1	-0.078706	0.848731	0.98226	1.23612	0.00291916	0.055803	0.775962	0.0607047	0.214932	0.51669	0.211029	0.581539	0.187173	0.684984	0.987022	1.25397	0.00686185	0.0485802	0.182404	0.658497	0.949961	-0.73263	0.112939	0.414515	0.131665	0.77535	0.986303	1.01318	0.0145017	0.0773588	-0.396563	0.33685	0.823951	0.856788	0.0384676	0.165774	0.124057	0.763696	1
51567	TDP2	0.934576	0.761982	0.964419	-2.80132	0.364212	1	0.543165	0.843972	0.980679	-1.34798	0.625289	1	0.788755	0.775035	0.941975	2.04075	0.459795	0.83678	0.87292	0.777253	0.999944	1.79304	0.561249	0.829082	1.5737	0.568605	0.91086	-0.805171	0.794134	0.986221	2.23155	0.469695	0.867503	0.127665	0.963103	0.998231	0.63178	0.818929	1	0.00396433	0.998854	1	0.600263	0.827816	1
343641	TGM6	-	-	-	-	-	-	-	-	-	-	-	-	-	-	-	-	-	-	-	-	-	-	-	-	-	-	-	-	-	-	-	-	-	-	-	-	-	-	-	-	-	-	-	-	-
339453	TMEM240	-13.3728	0.0394435	0.207959	-2.14711	0.740126	1	-16.3973	0.00486714	0.0436884	-6.54576	0.258656	0.845043	-15.1782	0.00909298	0.0556809	-5.44238	0.347504	0.740426	-9.0698	0.161755	0.582936	-10.0356	0.121699	0.351898	-15.5108	0.00769628	0.0683237	-8.06126	0.213505	0.588839	-10.5575	0.103554	0.401616	-20.149	0.000561103	0.00623352	-12.2231	0.0353461	0.253738	-22.8301	9.65198e-05	0.00160136	-14.6993	0.0115035	0.104312
1200	TPP1	6.66299	0.368113	0.734493	-5.43746	0.462572	1	6.07477	0.358938	0.715463	0.0156647	0.998111	1	7.9334	0.231093	0.510887	6.49601	0.326633	0.719833	4.6955	0.525792	0.933836	1.74366	0.813698	0.9567	6.4402	0.330801	0.735326	6.24315	0.399025	0.793424	6.00205	0.417465	0.832084	6.74464	0.308486	0.594869	2.83148	0.668791	0.98384	6.51413	0.325288	0.63201	3.60788	0.585706	0.946446
7222	TRPC3	16.8116	8.86094e-31	6.82937e-28	16.5806	4.04862e-30	4.03814e-27	16.7079	3.23836e-36	2.49589e-33	16.602	7.23655e-36	8.7645e-33	16.9231	6.29145e-37	4.63816e-34	16.8311	1.26827e-36	1.02404e-33	16.5217	5.95821e-30	4.59215e-27	16.4944	7.12142e-30	5.75004e-27	16.8374	1.20871e-36	9.31589e-34	16.6245	3.03441e-30	2.22403e-27	16.6452	2.64943e-30	1.95321e-27	16.8254	1.32417e-36	1.02057e-33	16.7338	2.65876e-36	1.80328e-33	16.8741	9.14017e-37	6.73829e-34	16.5168	1.38035e-35	1.17026e-32
146057	TTBK2	1.83931	0.340597	0.707655	0.804138	0.676775	1	1.53012	0.375377	0.731344	1.4413	0.403692	0.952548	1.37945	0.424148	0.716248	0.698977	0.685385	0.947116	1.17547	0.542339	0.941875	2.09239	0.278409	0.578943	1.03718	0.5478	0.900048	1.95724	0.310583	0.712958	0.56903	0.767989	0.985121	2.06374	0.232078	0.502395	1.26714	0.462811	0.911064	1.66715	0.33418	0.640556	1.21692	0.480717	0.888529
54902	TTC19	8.55285	0.000392698	0.00674178	6.63122	0.00580475	0.133007	7.49525	0.000511702	0.00722976	4.35371	0.042338	0.347756	8.17726	0.000154095	0.00221239	7.91539	0.000246759	0.00420085	7.47232	0.00191021	0.0307593	2.86548	0.231106	0.519064	6.24672	0.00368875	0.0400338	5.88838	0.0141873	0.108068	7.7215	0.00134678	0.0181816	8.49429	8.57049e-05	0.00132956	6.11386	0.00447464	0.0608924	8.38633	0.00010487	0.00172304	7.28338	0.000730144	0.0126459
7345	UCHL1	-190.918	0.1585	0.482588	9.19073	0.945799	1	-262.759	0.0303495	0.162747	-106.193	0.380096	0.94403	-253.978	0.0362952	0.151358	-206.765	0.0879575	0.345073	-226.278	0.0948572	0.438081	-454.861	0.000847101	0.0100867	-260.177	0.0320041	0.186762	-350.479	0.00988783	0.0840576	-188.398	0.164051	0.524562	-233.24	0.0544011	0.198346	-56.3704	0.641137	0.976221	-143.812	0.234798	0.525367	-201.443	0.0964049	0.419062
6843	VAMP1	0.619935	0.955117	1	0.412836	0.970102	1	0.335592	0.972826	1	-0.510979	0.958635	1	0.661474	0.946469	0.998802	0.322591	0.973879	1	0.872707	0.936849	1	-4.01706	0.715363	0.915379	0.540302	0.956264	1	0.756908	0.945214	1	0.695967	0.949619	1	0.496836	0.959779	0.998004	-1.43634	0.884086	1	-0.626656	0.949283	0.996782	0.434695	0.964806	1
51741	WWOX	1.31674	0.341341	0.707986	-0.354771	0.797543	1	0.971926	0.432211	0.779387	-1.93779	0.117862	0.598522	1.55956	0.207895	0.480648	1.15867	0.349199	0.742726	0.88708	0.521349	0.93113	0.802322	0.561896	0.829489	0.805285	0.515147	0.883876	1.2772	0.356014	0.756713	0.88017	0.524597	0.898765	1.01099	0.413956	0.700853	-0.47021	0.703864	0.992559	1.81466	0.142983	0.393063	-0.237967	0.847442	1
