# Supplementary material
Source: HighWire-hosted journal article supplement (https://jmg.bmj.com/content/56/5/283)
Supplement: inline-supplementary-material-12 [file inline-supplementary-material-12.xlsx]

## Sheet: Table S11
EntrezGene ID	Human gene	Stage 8
		Primary auditory cortex			Amygdala			Dorsolateral prefrontal cortex			Hippocampus			Posteroventral (inferior) parietal cortex			Inferolateral temporal cortex			Primary motor cortex			Mediodorsal nucleus of thalamus			Anterior (rostral) cingulate (medial prefrontal) cortex			Orbital frontal cortex			Primary somatosensory cortex			Posterior (caudal) superior temporal cortex			Striatum			Primary visual cortex			Ventrolateral prefrontal cortex
		logFC	Pvalue	adjPVal	logFC	Pvalue	adjPVal	logFC	Pvalue	adjPVal	logFC	Pvalue	adjPVal	logFC	Pvalue	adjPVal	logFC	Pvalue	adjPVal	logFC	Pvalue	adjPVal	logFC	Pvalue	adjPVal	logFC	Pvalue	adjPVal	logFC	Pvalue	adjPVal	logFC	Pvalue	adjPVal	logFC	Pvalue	adjPVal	logFC	Pvalue	adjPVal	logFC	Pvalue	adjPVal	logFC	Pvalue	adjPVal
56997	ADCK3	6.22768	4.36856e-13	3.85798e-11	5.04448	2.78432e-09	1.48462e-07	5.45358	1.56643e-10	1.05398e-08	5.92402	4.68635e-12	3.24334e-10	5.61366	1.59259e-12	1.10672e-10	5.46021	5.73389e-12	3.88895e-10	5.55867	7.28319e-11	4.90695e-09	5.56782	6.89433e-09	3.73483e-07	6.17616	6.57132e-13	5.62744e-11	5.37699	2.71868e-10	1.74614e-08	5.76627	1.5556e-11	1.15183e-09	5.9371	9.88362e-14	8.0185e-12	6.47104	2.42867e-11	1.55398e-09	5.85465	7.96502e-12	6.11108e-10	5.34777	3.35024e-10	2.16922e-08
10939	AFG3L2	1.99076	0.406049	0.752687	1.3542	0.571838	0.853754	0.476392	0.842323	0.96442	4.77106	0.0469815	0.183004	0.428745	0.846667	0.964509	0.568698	0.797573	0.942152	0.961643	0.688044	0.906346	-1.61298	0.552611	0.851595	2.94882	0.218705	0.549469	0.472759	0.843509	0.966539	1.30539	0.585768	0.885369	1.0955	0.621295	0.870994	2.1714	0.424129	0.774866	2.49306	0.298244	0.681832	0.924289	0.699558	0.921241
55129	ANO10	-0.485909	0.567291	0.857865	-1.54318	0.069868	0.276989	-1.29437	0.128113	0.419792	-0.670865	0.429752	0.692143	-0.601255	0.444624	0.771178	-1.07235	0.173181	0.458236	-1.04792	0.217727	0.544591	-2.08687	0.030791	0.177506	-1.1955	0.159809	0.466631	-1.2395	0.145036	0.442228	-0.476062	0.575167	0.880104	-0.84736	0.281553	0.621707	-0.751761	0.435181	0.783326	0.135429	0.873297	0.975983	-1.18434	0.163731	0.489002
54840	APTX	0.799042	0.364646	0.717407	-0.000952083	0.999138	1	1.15766	0.189337	0.518107	1.27494	0.148423	0.376182	0.907417	0.266288	0.606742	1.07411	0.188381	0.480619	1.11705	0.205295	0.527835	0.959352	0.33714	0.697919	0.800407	0.363829	0.70143	0.884723	0.315563	0.659357	0.811984	0.356939	0.739072	0.891582	0.274707	0.613452	-0.108366	0.913605	0.988585	1.15303	0.191108	0.549411	0.785418	0.372871	0.72986
472	ATM	0.526924	0.248272	0.605452	0.410763	0.367919	0.711256	0.834466	0.0678935	0.283827	0.749575	0.100847	0.297168	0.691395	0.102114	0.349703	0.674686	0.110637	0.351538	0.844224	0.0647536	0.271975	0.626597	0.226007	0.580005	0.783539	0.0863837	0.325262	0.906566	0.047414	0.223568	0.706897	0.121699	0.430653	0.811087	0.0553313	0.234902	-0.20122	0.697146	0.92725	0.76408	0.0944492	0.377975	0.787924	0.0846458	0.331928
1822	ATN1	40.2435	0.0161992	0.117382	35.3339	0.0345903	0.173115	22.3688	0.180116	0.504164	27.0235	0.105591	0.306627	28.3042	0.0672719	0.270812	29.7669	0.054365	0.22041	33.8536	0.0428531	0.209279	23.543	0.213351	0.565179	37.1581	0.0263206	0.151402	24.0251	0.15005	0.45101	32.2216	0.0538477	0.269357	36.3739	0.0188851	0.111071	52.83	0.00544159	0.0443168	26.7112	0.109665	0.412609	25.8279	0.121865	0.411786
492	ATP2B3	3.7404	0.244456	0.599507	2.42179	0.450825	0.777425	2.10142	0.512881	0.82933	3.50341	0.275576	0.544574	1.34407	0.651169	0.889065	3.18674	0.284055	0.605845	2.04176	0.524911	0.819934	3.52627	0.333035	0.693836	5.64866	0.079177	0.308648	3.07883	0.337879	0.680331	1.81321	0.572305	0.879306	1.37769	0.643047	0.882518	5.16895	0.156239	0.466393	1.19292	0.710234	0.928371	2.43612	0.448152	0.789164
51761	ATP8A2	6.32631	0.100782	0.373658	3.3362	0.386124	0.727881	5.61358	0.14517	0.449345	8.67521	0.0246739	0.119808	4.10694	0.249369	0.585394	5.39987	0.130169	0.386435	5.77464	0.134013	0.416024	0.944229	0.828647	0.965872	7.0041	0.0693579	0.284995	6.44074	0.0947936	0.342858	5.1699	0.179602	0.532642	4.84818	0.174065	0.480692	8.47664	0.0526592	0.236868	7.15233	0.0636931	0.305079	6.46472	0.0935759	0.351968
6310	ATXN1	-1.63242	0.284262	0.644981	-0.484396	0.750495	0.93322	-2.73277	0.0734786	0.297863	1.24446	0.41416	0.67752	-3.17388	0.0249431	0.13465	-2.00896	0.154895	0.4289	-0.88243	0.562467	0.84117	-0.0773295	0.964288	0.997649	-0.875986	0.565323	0.847229	-1.60766	0.291617	0.635527	-1.19146	0.434302	0.802356	-2.26936	0.108237	0.361131	-2.48528	0.150789	0.456976	-1.07529	0.480388	0.825777	-1.53145	0.31506	0.680055
25814	ATXN10	-0.642046	0.938833	0.988381	-4.97027	0.552588	0.842848	-4.79011	0.567071	0.86	4.44593	0.595238	0.814362	-5.36819	0.48846	0.798813	-7.53458	0.331051	0.654765	-0.490893	0.953214	0.990784	1.07092	0.910125	0.986666	-1.28134	0.878287	0.971887	-4.3667	0.601811	0.868508	-0.464576	0.95572	0.997383	-6.82566	0.378505	0.709733	1.5653	0.868953	0.980092	3.14443	0.707081	0.927459	-3.45409	0.67977	0.913028
6311	ATXN2	-0.352863	0.624974	0.886443	-1.1247	0.119824	0.386189	-0.877304	0.224671	0.567739	-0.121552	0.866262	0.956147	-0.49224	0.461512	0.782539	-0.748757	0.262925	0.580149	-0.757875	0.294087	0.634087	-1.45618	0.0758663	0.317548	-0.514598	0.476019	0.79349	-0.839246	0.245384	0.584069	-0.623029	0.388277	0.766187	-0.366194	0.58376	0.85516	-0.581808	0.477298	0.813537	-0.95193	0.187762	0.544569	-1.12424	0.119976	0.408338
4287	ATXN3	0.0253291	0.943388	0.989424	0.244705	0.492832	0.80821	0.0622467	0.861465	0.970535	0.753557	0.0352272	0.151718	-0.203743	0.537364	0.827515	0.16445	0.618555	0.86373	0.387593	0.277611	0.616347	0.394675	0.329482	0.689949	0.311153	0.38329	0.718366	0.332987	0.350843	0.69286	0.217737	0.541679	0.863793	0.105052	0.750414	0.922603	0.184632	0.648077	0.905722	0.349667	0.327272	0.710136	0.27652	0.438398	0.781567
6314	ATXN7	0.521834	0.207816	0.554925	0.378767	0.360313	0.703937	0.539063	0.193231	0.523726	0.656485	0.1133	0.320433	0.538878	0.160154	0.45759	0.611706	0.111002	0.35224	0.806573	0.0519269	0.236848	0.487957	0.298744	0.659399	0.579884	0.161714	0.469124	0.656992	0.113023	0.379743	0.772425	0.0626205	0.296342	0.609706	0.11217	0.367811	-0.0304967	0.948177	0.996422	0.35711	0.388399	0.763559	0.591855	0.153254	0.471202
56652	ATXN80S	1.66499	0.252033	0.608321	1.47791	0.309185	0.6523	1.72766	0.234655	0.581018	1.76311	0.225213	0.484116	1.66913	0.214949	0.541797	1.57379	0.242249	0.555227	1.703	0.241389	0.574455	1.45149	0.378325	0.734337	1.58876	0.274361	0.613647	1.66627	0.251668	0.592103	1.74523	0.229941	0.603335	1.56956	0.243515	0.577569	1.69406	0.303948	0.665923	1.75722	0.226762	0.601248	1.67308	0.249742	0.610909
146227	BEAN1	-0.754502	0.48136	0.808198	-0.353716	0.741257	0.929753	-2.41985	0.0244085	0.141157	-1.26391	0.238505	0.501304	-1.36023	0.170778	0.4765	-1.17314	0.237311	0.548134	-1.25919	0.24026	0.572813	-1.15663	0.341274	0.701922	-1.30586	0.223311	0.554225	-1.71928	0.109151	0.372539	-1.13565	0.289452	0.674077	-1.60659	0.105899	0.357702	0.906638	0.455576	0.798506	-1.57587	0.141879	0.474957	-1.96316	0.0675179	0.291232
56652	C10orf2	1.34813	0.0528675	0.256193	0.73032	0.293331	0.63733	0.940836	0.176049	0.498879	0.982922	0.157547	0.390493	1.1446	0.0757006	0.290666	1.07523	0.0951149	0.32063	0.80803	0.245055	0.578229	0.565297	0.472968	0.805489	1.30723	0.0604384	0.261293	0.531166	0.444523	0.772744	0.906415	0.192354	0.551217	0.96005	0.136003	0.413544	-0.00148475	0.998495	1	0.746393	0.282854	0.666963	0.91868	0.186421	0.52204
773	CACNA1A	39.3155	3.49843e-17	4.47953e-15	40.3543	6.20422e-18	8.62285e-16	36.887	1.79219e-15	2.15521e-13	43.7334	1.8746e-20	3.02721e-18	36.8673	1.51237e-17	1.72106e-15	38.7812	4.59923e-19	5.8635e-17	39.041	5.5007e-17	7.0659e-15	39.8157	2.868e-14	3.65638e-12	39.9963	1.12961e-17	1.49638e-15	36.6214	2.73006e-15	3.19248e-13	37.2819	9.55012e-16	1.16498e-13	38.2934	1.13111e-18	1.38979e-16	40.4178	1.26168e-14	1.18194e-12	36.1836	5.44111e-15	6.03003e-13	37.5426	6.28779e-16	7.72578e-14
440193	CCDC88C	-0.26473	0.853485	0.970044	-0.630976	0.659855	0.89748	-0.188149	0.895575	0.979869	-0.631024	0.659831	0.852881	-0.303126	0.819336	0.956323	-0.370622	0.780053	0.934873	-0.2221	0.876871	0.970782	-0.692945	0.669913	0.910837	-0.183877	0.897933	0.977771	-0.255256	0.858672	0.971829	-0.271459	0.849805	0.976523	-0.272891	0.837089	0.954603	-8.8402	1.00827e-07	3.61443e-06	-0.383205	0.789227	0.951412	-0.288614	0.840437	0.968516
5611	DNAJC3	0.393837	0.79344	0.953568	-1.41319	0.347727	0.692107	0.251828	0.867028	0.971678	0.716004	0.634085	0.837673	0.129529	0.925885	0.985075	0.737868	0.596249	0.851584	1.20068	0.4249	0.754843	0.68495	0.687984	0.917961	0.967072	0.520352	0.822143	1.69073	0.261392	0.602022	0.915895	0.542654	0.864372	0.680755	0.624977	0.873269	-2.63844	0.122492	0.401657	1.12059	0.456413	0.810446	0.550281	0.714483	0.927483
1786	DNMT1	12.8562	2.58079e-07	1.01296e-05	10.8959	1.13355e-05	0.000281002	11.6722	2.69105e-06	8.23636e-05	12.2767	8.3152e-07	2.46922e-05	11.6682	4.3254e-07	1.35818e-05	11.4065	7.624e-07	2.31671e-05	11.8329	1.97845e-06	6.34151e-05	11.5504	3.93229e-05	0.000886648	12.3641	6.98942e-07	2.38456e-05	11.0451	8.65199e-06	0.000236618	11.9422	1.60183e-06	5.60013e-05	12.0991	1.66347e-07	5.53056e-06	12.2148	1.41437e-05	0.000299029	11.9337	1.62863e-06	5.55635e-05	11.3745	4.71493e-06	0.000145357
1938	EEF2	305.372	0.0727961	0.310367	249.395	0.14254	0.428295	154.189	0.364147	0.722822	224.625	0.186452	0.43231	211.083	0.179946	0.490858	212.209	0.17764	0.465185	228.937	0.17816	0.486063	222.568	0.248163	0.605184	263.454	0.121436	0.395785	163.889	0.334794	0.677641	218.634	0.198443	0.560241	235.981	0.133981	0.409801	376.952	0.0509045	0.232151	205.985	0.225603	0.599614	176.41	0.299234	0.664111
6785	ELOVL4	6.16038	0.27143	0.631333	6.91384	0.217202	0.547572	7.20502	0.198496	0.531958	13.9727	0.012944	0.0755778	4.77074	0.357479	0.701715	8.08962	0.119115	0.367621	8.84393	0.114712	0.381459	7.88005	0.214842	0.56704	10.72	0.0560921	0.248718	9.73168	0.0827363	0.316621	7.9679	0.15514	0.492798	5.53778	0.285568	0.625294	10.5001	0.0986749	0.354477	9.51637	0.0897336	0.36734	8.61589	0.124334	0.416372
60481	ELOVL5	-5.99897	0.330392	0.689065	-6.34142	0.303573	0.646738	-5.99748	0.330512	0.690084	-2.2321	0.717074	0.885686	0.10119	0.985842	0.999629	-3.90307	0.493818	0.789753	-3.36544	0.58486	0.854388	-3.50071	0.61625	0.884695	-4.72971	0.442731	0.767115	-3.76981	0.5406	0.833993	-0.831426	0.89262	0.984081	2.81952	0.621043	0.870851	-11.8555	0.0902671	0.336463	-7.42628	0.228414	0.603223	-5.71845	0.353476	0.712498
2259	FGF14	7.88507	0.00246526	0.0289764	5.72348	0.0274799	0.146987	6.4116	0.0136083	0.0926304	10.2026	9.62542e-05	0.00164691	5.24126	0.0291973	0.151583	5.23575	0.0293662	0.143995	7.15743	0.00593337	0.0521276	8.97974	0.0023613	0.0266921	8.28972	0.00146921	0.0185494	6.5377	0.0118856	0.0857749	5.86272	0.0239539	0.160159	3.61528	0.131802	0.406235	5.37733	0.0674351	0.280459	8.40496	0.00126306	0.0187864	6.8992	0.00797285	0.0697203
2332	FMR1	-0.524185	0.836546	0.966949	3.82381	0.132955	0.41116	0.299597	0.90613	0.981493	5.91755	0.0203461	0.104924	-0.897959	0.702672	0.915014	1.71878	0.465127	0.769539	3.55947	0.161816	0.461456	4.62186	0.109306	0.392587	2.1295	0.402177	0.733906	2.89626	0.254752	0.594819	2.28264	0.36923	0.750218	1.44484	0.539159	0.827596	3.20257	0.266707	0.624185	2.21009	0.384622	0.759567	1.9679	0.438797	0.781785
2395	FXN	0.0631838	0.801516	0.955355	0.140973	0.574951	0.85584	0.123909	0.622067	0.885369	0.255477	0.309761	0.58028	0.0345287	0.882036	0.973368	0.0699637	0.763676	0.927969	0.128142	0.610222	0.870294	0.0876985	0.758301	0.94543	0.0771598	0.758855	0.936136	0.0383562	0.878706	0.977106	0.205223	0.414418	0.788119	0.130019	0.576405	0.850496	0.0452095	0.873955	0.980675	0.309883	0.218103	0.58977	0.0733795	0.770328	0.945604
57704	GBA2	13.3305	0.00330379	0.0363997	8.38091	0.0637064	0.260667	4.94746	0.2729	0.628197	15.3719	0.000722623	0.00854448	8.35987	0.0458302	0.210824	7.99574	0.056075	0.224929	6.50993	0.149378	0.442496	-10.8232	0.0348393	0.192556	8.88058	0.0495108	0.229248	6.08067	0.178003	0.494952	8.88575	0.0493792	0.254723	8.07095	0.053815	0.230642	14.2507	0.00557393	0.0450885	7.68813	0.0888234	0.366199	6.75685	0.134591	0.43677
9570	GOSR2	-0.0807441	0.952314	0.991067	-1.71543	0.204447	0.528064	-1.58908	0.23971	0.587613	0.141275	0.916669	0.977683	-0.94544	0.449648	0.774663	-1.73917	0.164742	0.444803	-1.16253	0.389499	0.724908	-1.28488	0.401577	0.752059	-1.10408	0.413751	0.744357	-1.12549	0.404764	0.741966	-0.564342	0.676011	0.92183	-1.48348	0.235818	0.568701	-0.158255	0.917672	0.989503	0.120521	0.928875	0.991368	-0.7222	0.592811	0.877878
2895	GRID2	19.8508	2.68397e-24	7.22371e-22	18.8357	2.52721e-22	5.42422e-20	19.6056	8.12943e-24	2.08853e-21	19.6671	6.16054e-24	1.45508e-21	19.6692	4.38959e-27	1.09456e-24	19.5166	9.46071e-27	2.32487e-24	19.575	9.32968e-24	2.36111e-21	19.5647	2.35231e-19	6.0433e-17	19.3213	2.9139e-23	6.50107e-21	19.5693	9.57231e-24	2.57632e-21	19.8101	3.22726e-24	9.12025e-22	19.6919	3.91475e-27	9.62008e-25	17.3188	7.59188e-16	8.09609e-14	19.9572	1.65624e-24	4.75988e-22	19.6886	5.59122e-24	1.48132e-21
2911	GRM1	19.6159	1.40185e-15	1.5638e-13	17.8179	2.6612e-13	2.50685e-11	18.7179	2.00715e-14	2.14046e-12	19.4067	2.62472e-15	2.76427e-13	18.0489	2.01472e-15	1.941e-13	17.9144	3.1107e-15	2.96321e-13	19.4204	2.51917e-15	2.82882e-13	13.8133	3.35159e-07	1.28829e-05	18.9462	1.02802e-14	1.05643e-12	19.1795	5.16123e-15	5.64605e-13	19.2815	3.81267e-15	4.25313e-13	18.0221	2.19755e-15	2.08363e-13	19.9059	5.56685e-13	4.45243e-11	20.3118	1.68916e-16	2.15349e-14	19.7779	8.60183e-16	1.03442e-13
3708	ITPR1	49.9714	2.7698e-09	1.50047e-07	55.9998	3.606e-11	2.53707e-09	47.8636	1.15758e-08	5.91203e-07	59.3645	2.74068e-12	1.99572e-10	44.8109	8.07316e-09	3.44807e-07	51.5725	4.49755e-11	2.68523e-09	50.4237	2.02561e-09	1.12243e-07	58.0396	1.18947e-09	7.44233e-08	53.4517	2.36166e-10	1.41499e-08	51.171	1.20218e-09	6.95708e-08	48.044	1.02614e-08	5.37111e-07	46.4367	2.43596e-09	1.12545e-07	42.4119	6.789e-06	0.000154723	51.1104	1.2544e-09	7.54239e-08	51.038	1.31969e-09	7.71609e-08
3748	KCNC3	15.4544	0.000104226	0.00219536	19.1135	1.82592e-06	5.61893e-05	14.8877	0.000183138	0.00317839	20.3868	3.81002e-07	1.20079e-05	13.3668	0.000283053	0.00389249	17.6267	1.99624e-06	5.604e-05	11.3711	0.00410795	0.0397118	22.0067	1.27975e-06	4.29693e-05	21.3055	1.17081e-07	4.70433e-06	15.2521	0.000127713	0.00247487	9.45698	0.016796	0.125515	15.3192	3.35186e-05	0.00065102	23.4265	2.69309e-07	8.86681e-06	11.3568	0.00415441	0.0473455	14.2626	0.000334353	0.00582062
3752	KCND3	19.874	4.52858e-10	2.74238e-08	17.2768	4.84173e-08	2.07839e-06	18.9858	2.36564e-09	1.31947e-07	22.2428	4.21668e-12	2.97909e-10	17.3594	3.63255e-09	1.62516e-07	19.1256	1.00478e-10	5.62278e-09	22.176	4.83571e-12	3.67687e-10	20.4501	1.30269e-08	6.70916e-07	22.0825	5.85539e-12	4.29801e-10	20.1984	2.44128e-10	1.58519e-08	19.5864	7.78208e-10	4.7295e-08	18.1581	7.40421e-10	3.6817e-08	21.5387	2.32496e-09	1.13282e-07	20.5708	1.19038e-10	8.04147e-09	21.0794	4.39558e-11	3.15811e-09
3766	KCNJ10	-35.4175	0.00822575	0.0715237	-32.8241	0.0142489	0.091835	-38.809	0.00381894	0.0358356	-33.8792	0.0114393	0.0689199	-25.2644	0.0413118	0.19512	-28.1383	0.0231581	0.122175	-37.4688	0.00520591	0.0474568	-38.1678	0.0119766	0.0910044	-32.2228	0.0161099	0.108501	-32.6282	0.0148332	0.101703	-34.0242	0.0110947	0.091991	-21.3751	0.0840266	0.309259	-53.6029	0.000442642	0.00586363	-44.0696	0.00104158	0.015954	-34.8941	0.00921435	0.0773458
9711	KIAA0226	-1.25749	0.547778	0.847544	-3.47851	0.0969506	0.340451	-2.36843	0.257902	0.610666	-1.55446	0.457516	0.71641	-1.77191	0.360438	0.703776	-2.17069	0.262711	0.579867	-1.20942	0.56318	0.841494	-2.01536	0.395672	0.747106	-2.0658	0.32363	0.663459	-2.52377	0.228044	0.565062	-1.70832	0.414267	0.788097	-1.37159	0.478888	0.788489	-3.38634	0.153926	0.462598	-1.52298	0.466671	0.817361	-2.05455	0.326268	0.689199
10749	KIF1C	-17.4445	0.0888319	0.347138	-11.0348	0.281145	0.624537	-4.72299	0.64436	0.893313	-25.647	0.0125772	0.073841	-6.46012	0.495331	0.803716	-18.4435	0.0521468	0.214352	-20.4541	0.0461996	0.219944	-26.6866	0.0219223	0.139755	-11.336	0.268243	0.607416	-18.0461	0.0784056	0.306253	-20.7017	0.0436373	0.23726	-12.3024	0.194519	0.51103	-7.67485	0.508336	0.833674	-17.4292	0.0891109	0.366467	-14.0213	0.171089	0.500644
92935	MARS2	0.157146	0.755807	0.940069	0.34323	0.497094	0.810936	0.0048225	0.992385	0.999586	0.507369	0.315665	0.586857	0.163032	0.727476	0.923769	0.219664	0.638711	0.874061	0.423763	0.40189	0.737415	0.301777	0.598455	0.876786	0.421018	0.404944	0.736052	0.371745	0.462071	0.784128	0.37109	0.46286	0.820089	0.334639	0.474553	0.785145	0.167889	0.769506	0.953074	0.156812	0.756309	0.944191	0.294496	0.560094	0.859842
4361	MRE11A	0.0991486	0.785973	0.951232	-0.298127	0.414419	0.749917	0.185621	0.611242	0.881597	0.00159792	0.996508	0.999609	-0.06687	0.843186	0.963391	0.137217	0.684826	0.894255	0.342437	0.348607	0.687141	0.155166	0.707836	0.926476	0.0869239	0.811829	0.953354	0.239518	0.511947	0.816793	0.292896	0.422649	0.794153	0.147452	0.662726	0.889653	-0.380903	0.357838	0.720605	0.229755	0.529288	0.853653	0.118776	0.744961	0.938395
4547	MTPAP	-	-	-	-	-	-	-	-	-	-	-	-	-	-	-	-	-	-	-	-	-	-	-	-	-	-	-	-	-	-	-	-	-	-	-	-	-	-	-	-	-	-	-	-	-
10528	NOP56	6.44959	0.0069652	0.0632237	2.81339	0.237102	0.574823	4.3322	0.0690734	0.286948	5.56945	0.0196257	0.101921	5.55382	0.0120147	0.0785053	3.49716	0.112731	0.354894	4.81782	0.0433258	0.210855	4.91966	0.0686573	0.297532	5.08083	0.0331596	0.177157	3.59183	0.131452	0.416527	4.89701	0.0400176	0.223498	4.31448	0.0506043	0.220748	6.94742	0.0103208	0.0719072	5.60364	0.0188928	0.137665	4.0802	0.0867748	0.336823
5111	PCNA	8.85297	0.188891	0.527944	9.31207	0.167028	0.471393	12.2835	0.0686292	0.285916	11.4034	0.0908453	0.278448	10.5826	0.090082	0.323883	9.6568	0.121808	0.372097	10.875	0.106763	0.365342	11.9939	0.116656	0.407116	11.1174	0.0992042	0.352163	11.2087	0.0964701	0.34641	11.4304	0.090085	0.36741	11.0992	0.0755149	0.28994	8.44751	0.268698	0.626174	9.28936	0.168063	0.51327	10.4884	0.11976	0.407903
5173	PDYN	-2.46217	0.917507	0.983006	-27.2363	0.252364	0.592234	-2.17323	0.927159	0.98656	-20.5111	0.388493	0.655779	-3.56388	0.871362	0.970506	-6.84376	0.755848	0.925242	-1.34307	0.954945	0.990784	-0.277261	0.991793	1	-3.27004	0.89059	0.97492	-2.5427	0.91482	0.986348	-1.66373	0.944204	0.997146	-6.05517	0.783229	0.934847	-61.2538	0.0235829	0.134728	-3.10872	0.895956	0.982239	-1.37045	0.954028	0.992838
23533	PIK3R5	-	-	-	-	-	-	-	-	-	-	-	-	-	-	-	-	-	-	-	-	-	-	-	-	-	-	-	-	-	-	-	-	-	-	-	-	-	-	-	-	-	-	-	-	-
11284	PNKP	-0.667608	0.670063	0.906994	-0.507453	0.746036	0.931433	-1.72417	0.271542	0.626944	-1.3339	0.394801	0.661683	-0.36717	0.800174	0.948657	-0.956363	0.509817	0.798635	-1.33884	0.393055	0.728344	-3.11581	0.0801273	0.328491	-0.236007	0.880263	0.972678	-2.43945	0.120121	0.39373	-1.44929	0.355246	0.737277	-0.29908	0.836647	0.954411	1.95313	0.272007	0.630713	-1.08843	0.487386	0.830611	-1.85366	0.237234	0.594699
5428	POLG	1.61975	0.236281	0.589371	0.144808	0.91559	0.987046	-0.219897	0.872134	0.973464	1.21087	0.375741	0.644583	0.614519	0.627147	0.87753	0.115901	0.926993	0.985398	0.0687953	0.95984	0.9919	1.06249	0.492956	0.818194	1.4156	0.300522	0.641124	0.0179003	0.989546	0.998604	1.09361	0.423663	0.794737	1.04498	0.408955	0.736198	0.890127	0.565665	0.866055	0.881616	0.518867	0.849055	-0.0622403	0.963664	0.994939
11128	POLR3A	1.74223	0.226288	0.578985	0.891618	0.535441	0.833328	0.232011	0.871855	0.973352	3.70518	0.0103614	0.0644017	0.16098	0.90378	0.978451	0.457639	0.731119	0.915352	1.02806	0.474925	0.78862	2.17694	0.182518	0.51917	1.71132	0.234616	0.569447	0.45231	0.753183	0.934146	1.06769	0.458081	0.816415	0.239786	0.857102	0.962617	3.47322	0.0337933	0.173531	1.68629	0.241515	0.619817	1.26621	0.378951	0.735098
5521	PPP2R2B	-15.0074	0.00285453	0.0323641	-17.3942	0.000561176	0.00783664	-16.6402	0.000957921	0.0122216	-8.41713	0.0928399	0.281825	-16.9141	0.000294568	0.00400537	-16.263	0.000495483	0.00643294	-12.7612	0.0110502	0.0823234	-9.22024	0.104419	0.382735	-13.443	0.00746201	0.063074	-15.3216	0.0023299	0.0258546	-12.7721	0.0109823	0.0912827	-16.5672	0.0003894	0.00512398	-20.7066	0.000296308	0.00418335	-12.852	0.0104967	0.0921231	-15.2775	0.00239769	0.0282132
144165	PRICKLE1	-7.23075	0.00517593	0.0505257	-4.33863	0.0922202	0.329961	-8.02914	0.00193225	0.021372	-3.58824	0.163469	0.399277	-8.7239	0.000284477	0.00390575	-7.06099	0.00320776	0.0283877	-7.47676	0.00385417	0.03771	-7.85398	0.00737267	0.0632326	-5.25346	0.041664	0.205365	-7.32938	0.00460316	0.0431699	-7.18319	0.00547458	0.0546041	-8.4826	0.000414753	0.0053972	-0.973796	0.738402	0.942087	-5.4871	0.0334321	0.20195	-7.10086	0.00602873	0.0562903
5582	PRKCG	16.8478	0.328418	0.687998	-56.1783	0.00121269	0.0142824	-17.4451	0.311587	0.671147	-54.6643	0.00163295	0.0161542	-6.627	0.677806	0.903407	-25.8671	0.105507	0.341733	-4.74445	0.783014	0.944055	-1.41528	0.942241	0.993201	-4.94858	0.773927	0.942791	-12.0197	0.485502	0.799862	12.1663	0.480201	0.830599	-7.04778	0.658612	0.889098	0.412012	0.983172	1	21.3687	0.215338	0.584977	-6.06299	0.724901	0.931521
26278	SACS	-2.44749	0.301978	0.662828	-3.27123	0.167972	0.472876	-1.93931	0.413287	0.764532	-0.314779	0.894306	0.969166	-3.53113	0.108113	0.361357	-2.23857	0.307844	0.631708	-1.75551	0.458907	0.779289	-1.92221	0.474464	0.806713	-1.10444	0.641159	0.887556	-1.03277	0.662953	0.899382	-2.0119	0.396041	0.773471	-2.57832	0.240302	0.574039	-6.34487	0.0186672	0.112959	-1.31748	0.57825	0.876362	-1.59631	0.500609	0.825827
950	SCARB2	-12.7442	0.224756	0.576631	-9.75075	0.352761	0.697134	0.680818	0.948235	0.990872	-0.709313	0.946072	0.987783	-2.85668	0.768587	0.939187	-3.39798	0.726365	0.913193	-3.4126	0.744876	0.928832	0.739872	0.950385	0.995405	0.0827652	0.993703	0.999954	0.560278	0.95739	0.993935	-4.22062	0.687365	0.926173	1.00905	0.917223	0.981957	-23.6124	0.0476961	0.222302	-3.12796	0.7655	0.945631	-3.83424	0.714663	0.927494
23064	SETX	2.41486	0.0883365	0.346591	1.42112	0.315219	0.658347	2.69205	0.057581	0.254789	2.82209	0.0465827	0.182037	2.0644	0.115456	0.374604	2.7663	0.0351791	0.164189	2.7423	0.0530983	0.240025	2.7193	0.0905453	0.35183	2.87353	0.0427513	0.209405	2.98948	0.0350859	0.184413	2.65037	0.0615357	0.29243	2.55766	0.051373	0.223011	0.0473873	0.97642	1	2.74936	0.0524924	0.271958	2.75064	0.0523833	0.247572
64374	SIL1	-0.913028	0.212396	0.561487	-2.9093	8.40015e-05	0.00162103	-1.40644	0.0551248	0.247602	-2.03504	0.005659	0.0417684	-1.36287	0.0447649	0.207047	-1.67872	0.0135801	0.0836409	-2.0669	0.00495831	0.0457549	-4.54939	7.88963e-08	3.45676e-06	-1.19542	0.102815	0.36064	-1.90952	0.00937706	0.0726679	-1.6286	0.026501	0.170768	-1.20691	0.0753478	0.289793	-3.19131	0.000140525	0.00219405	-0.997692	0.173092	0.522415	-2.22035	0.00256433	0.029379
6548	SLC9A1	1.12389	0.560024	0.854154	-2.38383	0.216802	0.547148	-0.19159	0.920841	0.984537	1.89985	0.324759	0.59313	-0.0613778	0.972569	0.995941	0.566131	0.751129	0.923578	-0.555552	0.773238	0.940598	-5.34584	0.0149039	0.105736	1.98866	0.302688	0.643717	0.245437	0.898699	0.981663	0.0354647	0.985324	1	0.289733	0.871054	0.966407	-2.18293	0.318362	0.680941	-0.797472	0.679176	0.919246	-0.283942	0.882915	0.975429
6687	SPG7	0.590501	0.784764	0.951209	-3.17076	0.143116	0.429004	-2.31545	0.28458	0.642008	-0.27832	0.897569	0.970735	-0.940458	0.638514	0.883374	-2.1903	0.274257	0.593833	-2.33778	0.27997	0.619009	-3.70513	0.131332	0.433328	-0.785259	0.716471	0.919787	-4.10462	0.0582878	0.255778	-1.37736	0.524193	0.855779	-1.51199	0.450204	0.768825	2.81567	0.251191	0.603793	-2.40364	0.266667	0.64801	-3.64166	0.0927814	0.350691
6712	SPTBN2	39.2591	0.000447697	0.00737721	26.1931	0.0185828	0.110495	19.3348	0.0817315	0.318804	30.8905	0.00557942	0.0413482	24.1358	0.01914	0.110387	24.1748	0.0189483	0.106045	31.3165	0.00496482	0.0457549	37.6351	0.00292662	0.0316478	32.5858	0.00348044	0.0359844	22.9017	0.0393984	0.20017	31.7609	0.00438984	0.0462842	27.6866	0.00727378	0.0539048	43.2607	0.000642541	0.00792935	30.4857	0.00622653	0.0640638	24.1421	0.0299446	0.174481
10273	STUB1	29.4843	0.277	0.637807	14.4417	0.594159	0.866252	6.76008	0.803013	0.950618	20.9556	0.439543	0.701581	14.3983	0.566128	0.843113	4.07644	0.870928	0.966504	15.0262	0.579322	0.851876	-1.26988	0.967035	0.998265	16.1628	0.550985	0.839263	-5.98135	0.825313	0.960383	14.0094	0.605242	0.89503	14.8255	0.55467	0.836972	51.8224	0.0923726	0.340864	10.4631	0.699446	0.924641	2.06309	0.939314	0.990178
23345	SYNE1	6.28926	0.000171395	0.00334812	6.08489	0.000274639	0.00439733	5.9631	0.000361555	0.00554296	5.39215	0.00123511	0.0130483	5.36942	0.000519231	0.00641229	6.413	3.63164e-05	0.000727015	6.34	0.000152163	0.00286994	5.95322	0.00165026	0.0201163	6.37356	0.000140582	0.00271802	6.30363	0.000165724	0.00304115	6.12024	0.000253364	0.00490415	5.98831	0.000112278	0.00182705	1.91033	0.309411	0.671514	5.97187	0.00035452	0.00654819	5.94879	0.000373318	0.00633631
255928	SYT14	0.524599	0.315597	0.675108	0.248136	0.63482	0.88656	0.453822	0.385222	0.741916	0.523463	0.316644	0.587845	0.275607	0.56884	0.84489	0.372859	0.440911	0.750226	0.561919	0.282454	0.620938	0.561205	0.3437	0.703922	0.489858	0.348668	0.687996	0.540812	0.300896	0.644492	0.585087	0.263116	0.64499	0.372675	0.441135	0.761815	0.126518	0.83086	0.97168	0.588903	0.260021	0.640925	0.463224	0.375465	0.731768
6908	TBP	1.14439	0.197913	0.542151	1.33149	0.134294	0.413639	1.10495	0.213776	0.552559	2.17368	0.0147767	0.0833509	1.15484	0.160598	0.45835	1.16495	0.156977	0.431954	1.80391	0.0427784	0.20907	1.66447	0.0988976	0.370409	1.49892	0.0920037	0.338266	1.58528	0.0748214	0.297043	1.51215	0.0891813	0.36552	1.36251	0.0980414	0.341003	1.58167	0.11678	0.390094	1.53249	0.0849797	0.359151	1.46444	0.0996987	0.36531
55775	TDP1	0.354773	0.358317	0.711931	0.44997	0.244174	0.582832	0.385721	0.317991	0.677668	0.987548	0.0108872	0.0666678	0.360096	0.313965	0.658887	0.396218	0.267962	0.585663	0.593333	0.124897	0.399577	0.74939	0.0875304	0.345982	0.505546	0.190834	0.510989	0.459317	0.234534	0.57121	0.435525	0.259615	0.642059	0.501104	0.161438	0.459136	0.239251	0.584696	0.876826	0.708968	0.0669149	0.314994	0.497076	0.198354	0.540635
51567	TDP2	2.2983	0.373578	0.72667	5.02933	0.0520377	0.226496	2.95486	0.252813	0.605258	6.78699	0.00890055	0.0576242	2.76355	0.248019	0.583598	3.66561	0.125746	0.37878	5.79928	0.0252078	0.14754	5.04761	0.0853106	0.341081	4.62496	0.0738757	0.294738	4.79917	0.0636862	0.270236	4.16491	0.107331	0.403357	3.19431	0.181945	0.492564	3.8599	0.187842	0.515713	3.16142	0.221212	0.594405	4.31644	0.095186	0.355657
343641	TGM6	-	-	-	-	-	-	-	-	-	-	-	-	-	-	-	-	-	-	-	-	-	-	-	-	-	-	-	-	-	-	-	-	-	-	-	-	-	-	-	-	-	-	-	-	-
339453	TMEM240	10.4889	0.0534221	0.257776	5.78884	0.285505	0.629717	0.475253	0.93007	0.986678	6.5405	0.22765	0.48744	3.57563	0.475914	0.791521	5.35075	0.286284	0.608682	6.80251	0.209604	0.534007	5.93875	0.333815	0.694584	7.32466	0.176789	0.492177	-0.256426	0.962234	0.994564	5.10887	0.345806	0.72947	5.24488	0.29591	0.636006	9.49792	0.122585	0.401809	4.50019	0.406224	0.77777	4.11938	0.447053	0.789032
1200	TPP1	-13.3175	0.0320286	0.18716	-26.2137	2.91381e-05	0.000650942	-19.9278	0.00139852	0.0166643	-19.3366	0.0019252	0.0184324	-11.4405	0.0465486	0.21287	-13.5767	0.0183134	0.103473	-16.387	0.00844698	0.0675547	-20.7853	0.00325763	0.0344366	-15.907	0.01055	0.0807244	-18.0087	0.00383716	0.0374786	-14.5948	0.0188693	0.135399	-9.39156	0.101951	0.350076	-33.4713	2.71527e-06	6.86605e-05	-16.1451	0.00945446	0.0861906	-16.8147	0.0068991	0.0626909
7222	TRPC3	5.96334	1.15332e-07	4.8854e-06	6.90687	1.07601e-09	6.20571e-08	6.41703	1.30088e-08	6.56478e-07	6.93652	9.21269e-10	4.55859e-08	6.56533	4.06184e-10	2.14556e-08	6.8645	7.04658e-11	4.05023e-09	6.64564	4.13601e-09	2.19844e-07	4.19114	0.000876145	0.0120584	6.63832	4.29245e-09	2.12815e-07	6.84767	1.46495e-09	8.25239e-08	6.09294	6.26211e-08	2.8932e-06	6.65359	2.43713e-10	1.29137e-08	3.12996	0.0126315	0.0840617	4.24609	0.000137445	0.00292965	6.46102	1.04595e-08	5.3099e-07
146057	TTBK2	1.0105	0.531304	0.837206	1.48392	0.358096	0.702195	0.943611	0.558817	0.857184	2.2661	0.160844	0.395601	-0.292096	0.844996	0.963922	1.14703	0.442831	0.751688	0.877103	0.586845	0.856025	0.139423	0.939263	0.99284	1.35616	0.40093	0.73264	1.49016	0.356081	0.698001	0.745333	0.644223	0.909075	0.306885	0.837256	0.954644	0.26735	0.883836	0.982074	1.03439	0.52165	0.85037	1.36965	0.396267	0.747814
54902	TTC19	-0.453748	0.820518	0.961486	2.20383	0.270899	0.613431	0.224258	0.910717	0.982448	2.97874	0.137008	0.358671	0.541027	0.770144	0.939456	1.46989	0.427482	0.738802	1.19587	0.549967	0.834398	0.552651	0.807463	0.960459	0.374443	0.851482	0.963802	0.572856	0.774551	0.942738	-0.0553699	0.977912	0.999363	0.75724	0.682591	0.896351	3.92097	0.0844766	0.322704	0.571308	0.775144	0.947212	0.199135	0.920683	0.984394
7345	UCHL1	-146.405	0.19609	0.53967	-318.125	0.00516887	0.0429478	-225.341	0.0469847	0.221526	-147.41	0.193046	0.441449	-199.902	0.0569322	0.242229	-246.728	0.0189493	0.106045	-202.837	0.0736073	0.294499	-391.407	0.00243649	0.0273054	-216.183	0.0566305	0.25028	-233.242	0.0398151	0.201825	-174.279	0.12402	0.435922	-249.766	0.0175407	0.105282	-113.438	0.376711	0.739466	-118.964	0.293302	0.67797	-213.361	0.0599178	0.270347
6843	VAMP1	-24.4064	0.00841858	0.0728293	-0.521442	0.954878	0.994711	-10.8316	0.240329	0.588365	0.6044	0.947709	0.98837	-13.7995	0.106469	0.358881	-1.53828	0.856923	0.962549	-32.9822	0.000391486	0.00618066	-22.0336	0.0355795	0.195112	0.27317	0.976352	0.995242	-5.69717	0.536552	0.83211	-38.6857	3.40293e-05	0.000859913	-12.1304	0.155712	0.449253	4.15957	0.690617	0.92479	-37.0265	7.15475e-05	0.00166643	-18.3699	0.0468634	0.231564
51741	WWOX	3.03162	0.0091327	0.0770419	1.82777	0.114837	0.376995	1.96935	0.08942	0.336785	1.1656	0.314096	0.584977	3.47457	0.00128709	0.01353	2.57888	0.0165178	0.0963124	2.14539	0.064378	0.271001	-0.145717	0.911562	0.986882	2.20309	0.0575598	0.252941	2.08903	0.0716709	0.289139	3.26361	0.00504217	0.0513176	3.69857	0.000619546	0.00750895	1.75606	0.181301	0.506282	1.80297	0.119827	0.433586	2.1736	0.0609652	0.273111
